# Supplementary material
Source: PubMed Central journal article supplement (PMC6531324)
Supplement: NIHMS1525283-supplement-3.pdf [file NIHMS1525283-supplement-3.pdf]

Supplementary Table 1

## Antibodies and fluorescent dyes

| Antigen         | Clone         | Catalog                       | Lot                  | Fluorophore     | Vendor                      | Application              | Dilution     |
|-----------------|---------------|-------------------------------|----------------------|-----------------|-----------------------------|--------------------------|--------------|
| Beta actin      | polyclonal    |                               | 4967                 | 7 Unconjugated  | Cell Signaling Technologies | Immunoblotting           | 1/5000       |
| Dec1 (Bhlhe40)  | polyclonal    | NB100                         | C-1                  | Unconjugated    | Novus Biologicals           | ChIP-Seq                 | 10 µg/sample |
| BrdU            | Not available | 51-23619L,<br>from 552598 kit | Multiple             | APC             | BD                          | Flow cytometry           | 1/100-1/200  |
| CD11b           | M1/70         | 35-0112                       | C0112083017353       | FITC            | Tonbo                       | Flow cytometry           | 1/400        |
| CD11b           | M1/70         | 101216 and 25-0114            | Multiple             | PE/Cy7          | BioLegend, Tonbo            | Flow cytometry           | 1/400        |
| CD11b           | M1/70         |                               | 101212 Multiple      | APC             | BioLegend                   | Flow cytometry           | 1/400        |
| CD11b           | M1/70         | 101226 and 25-0112            | Multiple             | APC/Cy7         | BioLegend, Tonbo            | Flow cytometry           | 1/400        |
| CD11c           | N418          |                               | 117312 Multiple      | AF647           | BioLegend                   | Flow cytometry           | 1/200        |
| CD11c           | N418          | 117324 and 25-0114            | Multiple             | APC/Cy7         | BioLegend, Tonbo            | Flow cytometry           | 1/200        |
| CD16/32         | 2.4G2         | 8E0008                        | Multiple             | Unconjugated    | BioXCell                    | Flow cytometry (Fcblock) | 1/200        |
| CD19            | 1D3           | 65-0193                       | Multiple             | PerCP/Cy5.5     | Tonbo                       | Flow cytometry           | 1/200        |
| CD19            | 1D3           |                               | 115530 Multiple      | APC/Cy7         | BioLegend                   | Flow cytometry           | 1/200        |
| CD45            | 30-F11        |                               | 557659 Multiple      | APC/Cy7         | BD                          | Flow cytometry           | 1/200        |
| CD45            | 30-F11        |                               | 563891 Multiple      | BV510           | BD                          | Flow cytometry           | 1/200        |
| CD45.1          | A20           |                               | 110706 Multiple      | FITC            | BioLegend                   | Flow cytometry           | 1/200        |
| CD45.1          | A20           |                               | 110728 C045308151653 | PE              | Tonbo                       | Flow cytometry           | 1/200        |
| CD45.1          | A20           | 110728 and 65-0453            | Multiple             | PerCP/Cy5.5     | BioLegend, Tonbo            | Flow cytometry           | 1/200        |
| CD45.1          | A20           | 110722 and 75-0453            | Multiple             | PB, V450        | BioLegend, Tonbo            | Flow cytometry           | 1/200        |
| CD45.1          | A20           |                               | 110704 B197550       | Biotin          | BioLegend                   | Flow cytometry           | 1/200        |
| CD45.2          | 104           |                               | 109806 Multiple      | FITC            | BioLegend                   | Flow cytometry           | 1/200        |
| CD45.2          | 104           | 50-0454                       | C0454011717503       | PE              | Tonbo                       | Flow cytometry           | 1/200        |
| CD45.2          | 104           |                               | 109814 Multiple      | APC             | BioLegend                   | Flow cytometry           | 1/200        |
| CD45.2          | 104           | 80-0454                       | C0454040314802       | RF710           | Tonbo                       | Flow cytometry           | 1/200        |
| CD45.2          | 104           |                               | 109804 Multiple      | Biotin          | BioLegend                   | Flow cytometry           | 1/200        |
| CD64            | X54-5/7.1     |                               | 139306 Multiple      | APC             | BioLegend                   | Flow cytometry           | 1/200        |
| CD102 (ICAM2)   | 3C4 (MIC2/4)  |                               | 105606 Multiple      | FITC            | BioLegend                   | Flow cytometry           | 1/200        |
| CD102 (ICAM2)   | 3C4 (MIC2/4)  |                               | 105612 Multiple      | AF647           | BioLegend                   | Flow cytometry           | 1/200        |
| CD102 (ICAM2)   | 3C4 (MIC2/4)  |                               | 105604 B201603       | Biotin          | BioLegend                   | Flow cytometry           | 1/200        |
| CD115           | AFS98         | 50-1152                       | Multiple             | PE              | Tonbo                       | Flow cytometry           | 1/200        |
| CD115           | AFS98         |                               | 135513 Multiple      | BV421           | BioLegend                   | Flow cytometry           | 1/200        |
| CD115           | AFS98         |                               | 135507 B204156       | Biotin          | BioLegend, Tonbo            | Flow cytometry           | 1/200        |
| CD226           | 10E5          |                               | 128803 NA            | FITC            | BioLegend                   | Flow cytometry           | 1/200        |
| CD226           | 10E5          |                               | 128806 Multiple      | PE              | BioLegend                   | Flow cytometry           | 1/200        |
| CD301 (Clec10a) | LOM-14        |                               | 145706 Multiple      | PE/Cy7          | BioLegend                   | Flow cytometry           | 1/200        |
| CDK2            | 78B2          |                               | 2546                 | 8 Unconjugated  | Cell Signaling Technologies | Immunoblotting           | 1/1000       |
| CDK4            | DCS31         | sc-56277                      | K0818                | Unconjugated    | Santa Cruz                  | Immunoblotting           | 1/1000       |
| CDK6            | DCS83         |                               | 3136                 | 2 Unconjugated  | Cell Signaling Technologies | Immunoblotting           | 1/2000       |
| Cyclin D1       | 92G2          |                               | 2978                 | 12 Unconjugated | Cell Signaling Technologies | Immunoblotting           | 1/1000       |
| Cyclin D2       | D52F9         |                               | 3741                 | 5 Unconjugated  | Cell Signaling Technologies | Immunoblotting           | 1/1000       |
| Cyclin D3       | DCS22         |                               | 2936                 | 5 Unconjugated  | Cell Signaling Technologies | Immunoblotting           | 1/2000       |
| E2F2            | EPR8622       | ab138515                      | GR3207895-1          | Unconjugated    | Abcam                       | Immunoblotting           | 1/1000       |
| Embigin-1       | G7.43.1       | 12-5839                       | Multiple             | PE              | eBioscience/Invitrogen      | Flow cytometry           | 1/200        |
| F4/80           | BM8.1         | 123110 and 20-4801            | Multiple             | PE              | BioLegend, Tonbo            | Flow cytometry           | 1/200        |

|                                       |              |                           |                 |               |                                     |                         |                  |
|---------------------------------------|--------------|---------------------------|-----------------|---------------|-------------------------------------|-------------------------|------------------|
| F4/80                                 | BM8.1        | 65-4801                   | C4801012916653  | PerCP/Cy5.5   | Tonbo                               | Flow cytometry          | 1/200            |
| F4/80                                 | BM8.1        | 50-4801                   |                 | 123116 APC    | BioLegend, Tonbo                    | Flow cytometry          | 1/200            |
| I-A/I-E (MHC-II)                      | M5/114.15.2  |                           | 107635 Multiple | BV510         | BioLegend                           | Flow cytometry          | 1/200-1/400      |
| I-A/I-E (MHC-II)                      | M5/114.15.2  |                           | 107620 Multiple | PB            | BioLegend                           | Flow cytometry          | 1/200-1/400      |
| I-A/I-E (MHC-II)                      | M5/114.15.2  | 80-5321                   | Multiple        | RF710         | Tonbo                               | Flow cytometry          | 1/200-1/400      |
| IL-4                                  | 11B11        | I-1071                    | 0814L365        | Unconjugated  | Leinco                              | In vivo IL-4c treatment | NA (see methods) |
| IL-4                                  | 11B11        | BE0045                    | Multiple        | Unconjugated  | BioXCell                            | In vivo IL-4c treatment | NA (see methods) |
| Ki67                                  | SolA15       | 46-5698                   | Multiple        | PerCP/e710    | eBioscience                         | Flow cytometry          | 1/200            |
| Ly6C                                  | HK1.4        |                           | 128006 Multiple | FITC          | BioLegend                           | Flow cytometry          | 1/200            |
| Ly6C                                  | HK1.4        |                           | 128012 Multiple | PerCP/Cy5.5   | BioLegend                           | Flow cytometry          | 1/200            |
| Ly6C                                  | HK1.4        |                           | 128026 Multiple | APC/Cy7       | BioLegend                           | Flow cytometry          | 1/200            |
| Ly6C                                  | HK1.4        |                           | 128033 Multiple | BV510         | BioLegend                           | Flow cytometry          | 1/200            |
| Ly6C                                  | HK1.4        |                           | 128014 Multiple | PB            | BioLegend                           | Flow cytometry          | 1/200            |
| Lyve-1                                | ALY7         | 53-0443                   | Multiple        | AF488         | eBioscience                         | Flow cytometry          | 1/200            |
| Lyve-1                                | ALY7         | 50-0443                   | E12123-1637     | eF660         | eBioscience                         | Flow cytometry          | 1/200            |
| pHH3                                  | D2C8         |                           | 3458 Multiple   | AF647         | Cell Signaling Technologies         | Flow cytometry          | 1/200            |
| RELM $\alpha$                         | polyclonal   | 500-P214                  | Multiple        | Unconjugated  | Peprotech                           | Flow cytometry          | 1/200            |
| Siglec-F                              | E50-2440     |                           | 552126 Multiple | PE            | BD                                  | Flow cytometry          | 1/200            |
| TIM4                                  | RMT4-54 (54) | 12-5866                   | Multiple        | PE            | eBioscience                         | Flow cytometry          | 1/200            |
| TIM4                                  | RMT4-54 (54) |                           | 130010 Multiple | PE/Cy7        | BioLegend                           | Flow cytometry          | 1/200            |
| TIM4                                  | RMT4-54 (54) |                           | 130007 B218029  | AF647         | BioLegend                           | Flow cytometry          | 1/200            |
| Goat $\alpha$ Rabbit                  | polyclonal   | A11034                    |                 | 1705912 AF488 | Life Technologies                   | Flow cytometry          | 1/200            |
| Goat $\alpha$ Rabbit                  | polyclonal   | A21245                    |                 | 1700082 AF647 | Life Technologies                   | Flow cytometry          | 1/200            |
| Mouse $\alpha$ Rabbit IgG light chain | polyclonal   | 211-032-171               |                 | 116819 HRP    | Jackson ImmunoResearch Laboratories | Immunoblotting          | 1/10000          |
| Goat $\alpha$ Mouse IgG light chain   | polyclonal   | 115-035-174               |                 | 139280 HRP    | Jackson ImmunoResearch Laboratories | Immunoblotting          | 1/10000          |
| Streptavidin                          | NA           | 50-4317                   | C4317042116503  | PE            | Tonbo                               | Flow cytometry          | 1/400            |
| Streptavidin                          | NA           |                           | 405214 B249755  | PerCP/Cy5.5   | BioLegend                           | Flow cytometry          | 1/400            |
| Streptavidin                          | NA           |                           | 405206 B207311  | PE/Cy7        | BioLegend                           | Flow cytometry          | 1/400            |
| Streptavidin                          | NA           |                           | 405207 B145530  | APC           | BioLegend                           | Flow cytometry          | 1/400            |
| Streptavidin                          | NA           | 47-4317                   | E08466-1635     | APC/e780      | ebBioscience                        | Flow cytometry          | 1/400            |
| Streptavidin                          | NA           |                           | 561419          | 2104987 V500  | BD                                  | Flow cytometry          | 1/400            |
| Streptavidin                          | NA           |                           | 560797          | 36864 V450    | BD                                  | Flow cytometry          | 1/400            |
| 7-AAD                                 | NA           | 51-2359KC from 552598 kit | Multiple        | NA            | BD, BioLegend                       | Flow cytometry          | 1/20             |
| DAPI                                  | NA           |                           | 428801 B212123  | NA            | BioLegend                           | Flow cytometry          | final 3 $\mu$ M  |
| Po pro 1                              | NA           | V35123                    |                 | 1543354 NA    | Life Technologies                   | Flow cytometry          | 1/1000           |
